# Supplementary material for: Elastic Three-Dimensional Graphene Sponge Fabricated by the Liquid Crystals of Controlled Large Graphene Oxide Sheets
Source: Preprints.org preprint supplement (doi:10.20944/preprints201801.0145.v1), 2018-01-16
Supplement: Supplementary file 1 [file Supplementary Files.docx]

Supplementary Files

**Elastic three-dimensional graphene sponge fabricated by the liquid crystals of controlled large graphene oxide sheets**

Qiuli Wei, Anaerguli Wufuer, Meisong Wang, Yuanyuan Wang *, Liyi Dai

College of Chemistry and Molecular Engineering, East China Normal University, 500 Dongchuan Road, Shanghai 200241, China

*Corresponding author: Yuanyuan Wang

Tel./fax:+86-21-54340133

E-mail: [ecnu_yywang@163.com](mailto:ecnu_yywang@163.com)


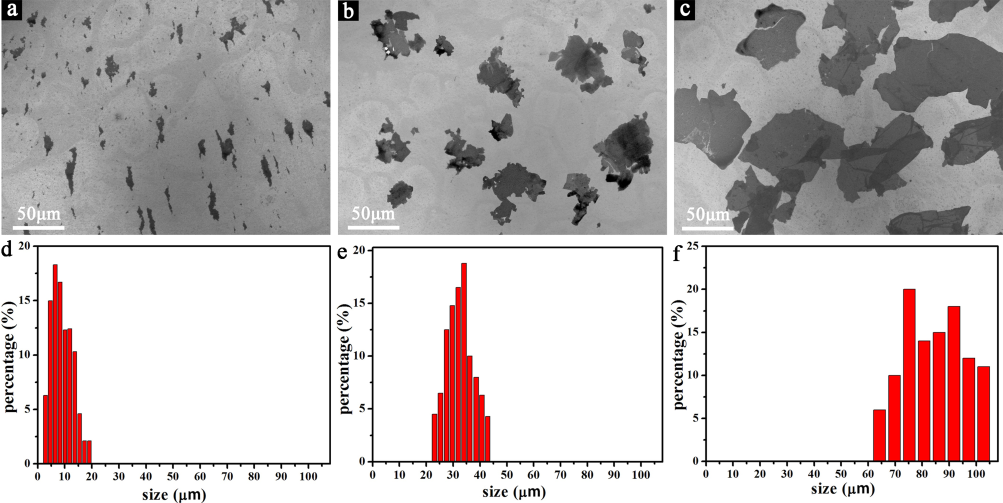


Fig. S1 Typical SEM images (a,b,c) and corresponding histogram of GO sheets size distribution (d,e,f) of SGO, LGO, and ULGO





Fig. S2 SEM images of 3DG sponge constructed with LGO + KOH (0.007M) (a) and LGO + KOH (0.028M) (b)





Fig. S3 SEM images of 3DG sponge constructed with LGO + KOH (0.014M) reduced by ascorbic acid (0.12g) (a) and ascorbic acid (0.48g) (b)


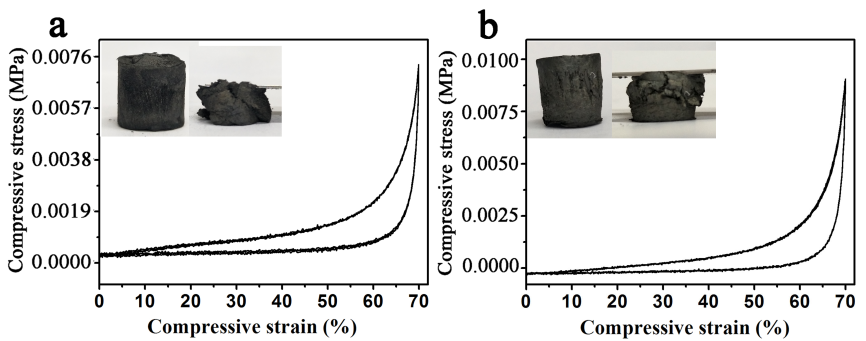


Fig. S4 Compressive stress–strain curves of 3 cycles of loading and unloading of 3D EG sponge prepared with ULGO (a) and LGO (b).
